# Supplementary material for: Gut microbe–skin axis on a chip for reproducing the inflammatory crosstalk
Source: Royal Society of Chemistry journal article supplement (doi:10.1039/d4lc01010h), 2025-01-01
Supplement: d4lc01010h1.pdf [file d4lc01010h1.pdf]

## Supplementary information

### Gut microbe-skin axis on a chip for reproducing the inflammatory crosstalk

*Byungho Ko*<sup>1</sup>, *Jimin Son*<sup>1</sup>, *Jong In Won*<sup>1</sup>, *Bo Mi Kang*<sup>2</sup>, *Chong Won Choi*<sup>2,3</sup>, *Raehyun Kim*<sup>4\*</sup>, *Jong Hwan Sung*<sup>1\*</sup>

<sup>1</sup> Department of Chemical Engineering, Hongik University, Seoul, 04066, Republic of Korea

<sup>2</sup> Department of Dermatology, Seoul National University Bundang Hospital, Seongnam, Republic of Korea

<sup>3</sup> Department of Dermatology, Seoul National University College of Medicine, Seoul, Republic of Korea.

<sup>4</sup> Department of Biological and Chemical Engineering, Hongik University, Sejong, 30016, Republic of Korea

Email address: [jhsung22@hongik.ac.kr](mailto:jhsung22@hongik.ac.kr) (Jong Hwan Sung), [raehyunkim@hongik.ac.kr](mailto:raehyunkim@hongik.ac.kr) (Raehyun Kim)

**Table S1.** The composition of the culture medium for the skin model and the cocultures.

| Reagent                      | Final concentration |
|------------------------------|---------------------|
| HEKa differentiation medium  |                     |
| DMEM                         | 48.5 v/v%           |
| DMEM/F-12 1:1 mixture        | 48.5 v/v%           |
| HKGS                         | 1 v/v%              |
| KGF                          | 10 ng/mL            |
| Ascorbic acid                | 50 µg/mL            |
| Serine                       | 1 mM                |
| Carnitine                    | 10 µM               |
| Insulin                      | 5 µg/mL             |
| Gibco chemical defined lipid | 1 v/v%              |
| Penicillin/streptomycin      | 1 v/v%              |
| Gut-Skin coculture medium    |                     |
| DMEM                         | 49.5 v/v%           |
| DMEM/F-12 1:1 mixture        | 49.5 v/v%           |
| HKGS                         | 1 v/v%              |
| KGF                          | 10 ng/mL            |
| Ascorbic acid                | 50 µg/mL            |
| Serine                       | 1 mM                |
| Carnitine                    | 10 µM               |
| Insulin                      | 5 µg/mL             |

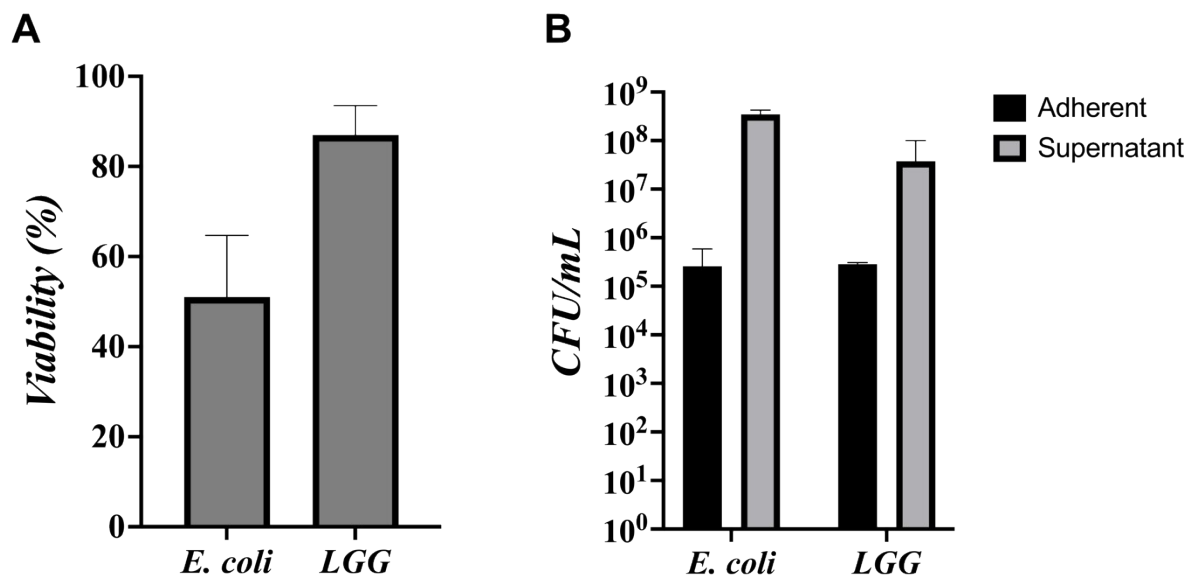

**Figure S1.** The cell viability of Caco-2 cells (A) and bacterial growth (B) in the gut bacterial coculture in the aerobic condition. The bacterial inoculation density is  $1 \times 10^5$  CFU/mL

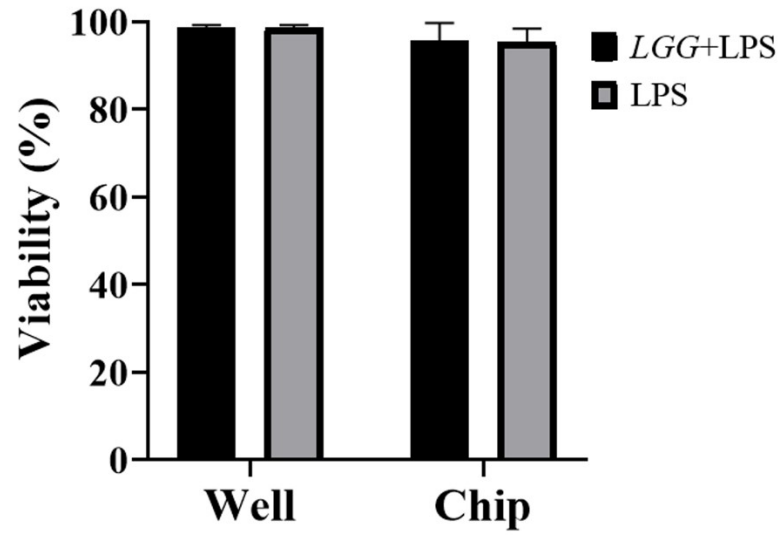

**Figure S2.** The cell viability (Caco-2) in the presence of LPS with and without *LGG* in well plates and the chip.
